# Supplementary material for: A common genetic variant within SCN10A modulates cardiac SCN5A expression
Source: JCI journal article supplement (doi:10.1172/jci73140), 2014-03-18
Supplement: sd1 [file 1]

## Supplemental Data

### Common genetic variant in *SCN10A* modulates cardiac *SCN5A* expression

Malou van den Boogaard<sup>\*4</sup>, Scott Smemo<sup>\*3</sup>, Ozanna Burnicka-Turek<sup>\*1,2</sup>, David E. Arnolds<sup>\*1,2</sup>, Harmen J.G. van de Werken<sup>5</sup>, Petra Klous<sup>6</sup>, David McKean<sup>7</sup>, Jochen D. Muehlschlegel<sup>8</sup>, Julia Moosmann<sup>9</sup>, Okan Toka<sup>9</sup>, Xinan H. Yang<sup>1,2</sup>, Tamara T. Koopmann<sup>10</sup>, Michiel E. Adriaens<sup>10</sup>, Connie R. Bezzina<sup>10</sup>, Wouter de Laat<sup>6</sup>, Christine Seidman<sup>7</sup>, J. G. Seidman<sup>7</sup>, Vincent M. Christoffels<sup>#4</sup>, Marcelo A. Nobrega<sup>#3</sup>, Phil Barnett<sup>#4</sup>, and Ivan P. Moskowitz<sup>#1,2</sup>

Departments of Pediatrics<sup>1</sup>, Pathology<sup>2</sup>, and Human Genetics<sup>3</sup>, The University of Chicago, Chicago, IL, USA; Department of Anatomy, Embryology and Physiology<sup>4</sup>, Academic Medical Center, University of Amsterdam, Amsterdam, The Netherlands; Department of Cell Biology<sup>5</sup>, Erasmus Medical Center, Rotterdam, The Netherlands; Institute-KNAW & University Medical Center Utrecht<sup>6</sup>, Utrecht, The Netherlands; Department of Genetics<sup>7</sup>, Harvard Medical School, Boston, MA, USA; Department of Anesthesiology, Perioperative and Pain Medicine<sup>8</sup>, Brigham and Women's Hospital, Harvard Medical School, Boston, MA, USA; Department of Pediatric Cardiology<sup>9</sup>, Children's Hospital University of Erlangen-Nuremberg, Erlangen, Germany; Department of Clinical and Experimental Cardiology<sup>10</sup>, Academic Medical Center, University of Amsterdam, the Netherlands

\* These authors contributed equally to this work

# These authors jointly directed this work

Correspondence should be addressed to: Vincent M. Christoffels, Department of Anatomy, Embryology, and Physiology, University of Amsterdam, Meibergdreef 9, 1105 AZ Amsterdam, The Netherlands, Phone: 3120.5667821; Fax: 3120.6976177; E-mail:[v.m.christoffels@amc.uva.nl](mailto:v.m.christoffels@amc.uva.nl); Phil Barnett, Department of Anatomy, Embryology, and Physiology, University of Amsterdam, Meibergdreef 9, 1105 AZ Amsterdam, The Netherlands, Phone: 3120.5667822; Fax: 3120.6976177; E-mail:[p.barnett@amc.uva.nl](mailto:p.barnett@amc.uva.nl); Marcelo A. Nobrega, Department of Human Genetics, University of Chicago, 920 E. 58th Street CLSC 319, Chicago, IL-60637, USA. Phone: 1.773.834.7919; Fax: 1.773.834.8470; E-mail:[nobrega@uchicago.edu](mailto:nobrega@uchicago.edu); or Ivan P. Moskowitz, Departments of Pediatrics and Pathology, The University of Chicago, 900 E. 57th Street, KCBD, Rm 5118, Chicago, IL-60637, USA. Phone: 773.834.0462; Fax: 773.834.2132; E-mail:[imoskowitz@uchicago.edu](mailto:imoskowitz@uchicago.edu).

**Supplementary Figure 1**

**Supplementary Figure 2**

**Supplementary Figure 3**

**Supplementary Figure 4**

**Supplementary Figure 5**

**Supplementary Table 1**

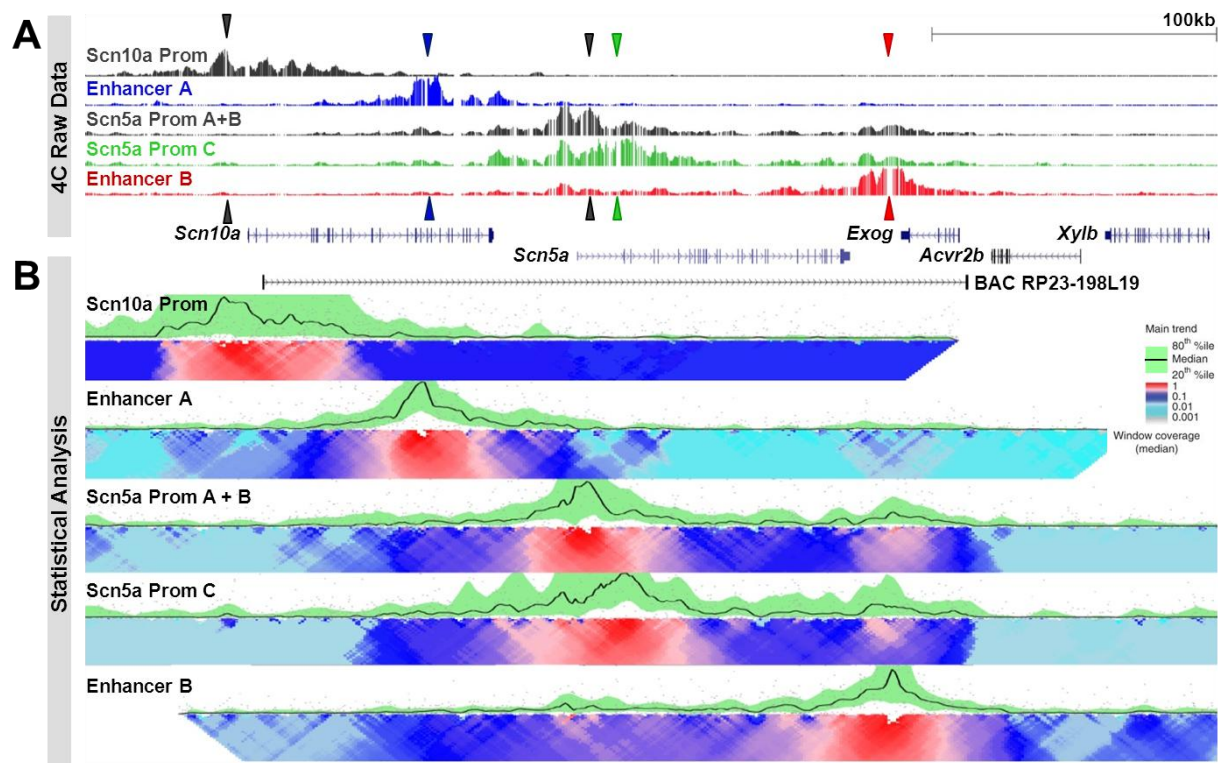

**Supplementary Figure 1: Contact profiles of enhancers and promoters of the *Scn5a-Scn10a* locus.** (A) UCSC genome browser traces are shown for viewpoints of the *Scn10a* promoter (grey, first lane), enhancer A (blue, second lane), *Scn5a* promoter A+B (grey, third lane), *Scn5a* promoter C (green) and enhancer B (red). (B) In this figure, normalized contact intensities (gray dots) and their running median trends (black line) are depicted for all viewpoints in and around *Scn10a* and *Scn5a*. Medians are computed for 4 kb windows and the green band displays the 20–80% percentiles for these windows. Below the profile, statistical enrichment across differently scaled window sizes (from 2 kb (top row) to 50 kb (bottom)) is depicted of the observed number of sequenced ligation products over the expected total coverage of captured products, with the latter being estimated based on a probabilistic background model (26). Local changes in color codes indicate regions statistically enriched for captured sequences, which correspond to the promoter-enhancer contacts described. Note that the green 80% percentile band and color codes in the Enhancer A viewpoint tract indicates contacts between Enhancer A, B and the *Scn5a* promoter regions. From the *Scn5a* Prom A+B and Prom C viewpoints, contacts with enhancer A and B and weakly with the *Scn10a* promoter region can be observed. From Enhancer B contacts with the *Scn5a* promoter region and, weakly, with Enhancer A can be seen. The *Scn10a* promoter viewpoint (top tract) does not reveal contacts between the enhancer regions and promoter of *Scn5a*.

WT BAC (transient transgenic lines): 6 Genotype Positive

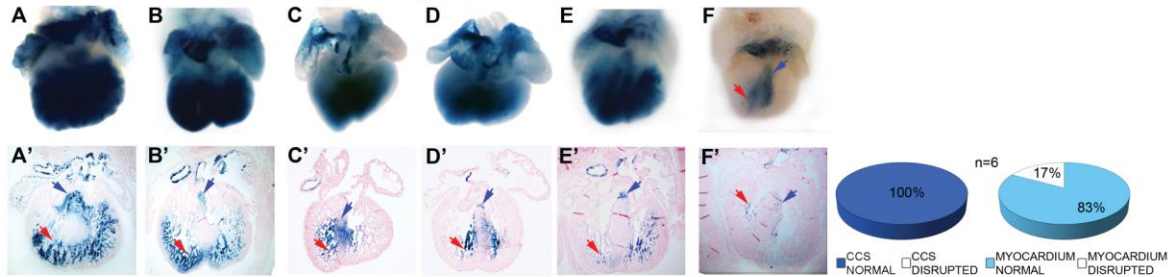

EnhA DEL BAC (transient transgenic lines): 9 Genotype Positive

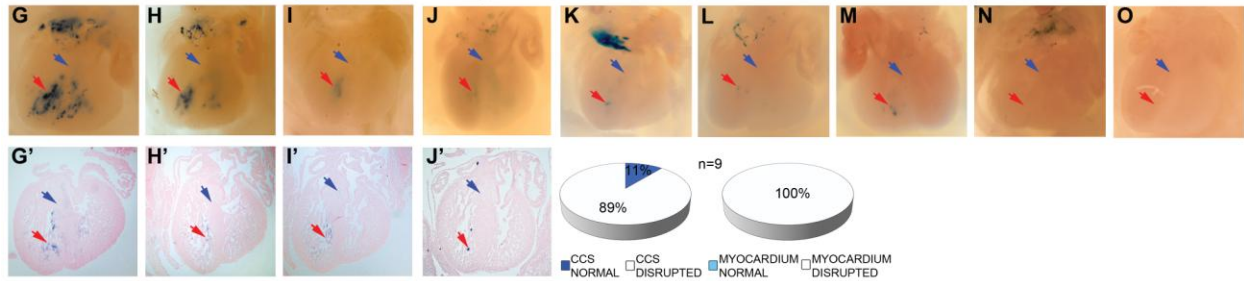

EnhB DEL BAC (transient transgenic lines): 7 Genotype Positive

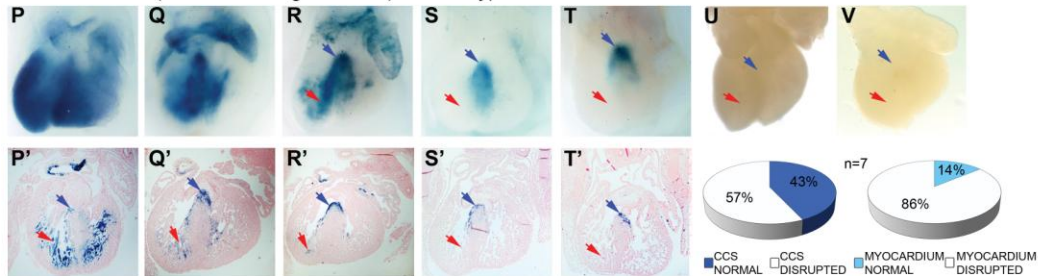

EnhA/B DEL BAC (transient transgenic lines): 7 Genotype Positive

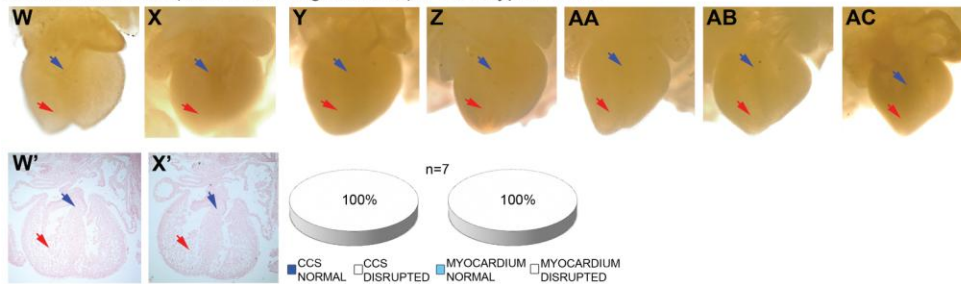

**Supplementary Figure 2: Evaluation of all BAC transgenic embryos at E13.5.** All wild-type (n=6), enhancer A deleted (n=9), enhancer B deleted (n=7), and enhancer A and B deleted (n=7) BAC transgenic embryos are shown. Embryos are arranged in descending order of staining intensity for each construct. Sections embryos are shown at 10x original magnification.

EnhA rs6801957-Minor-BAC (transient transgenic lines): 16 Genotype Positive

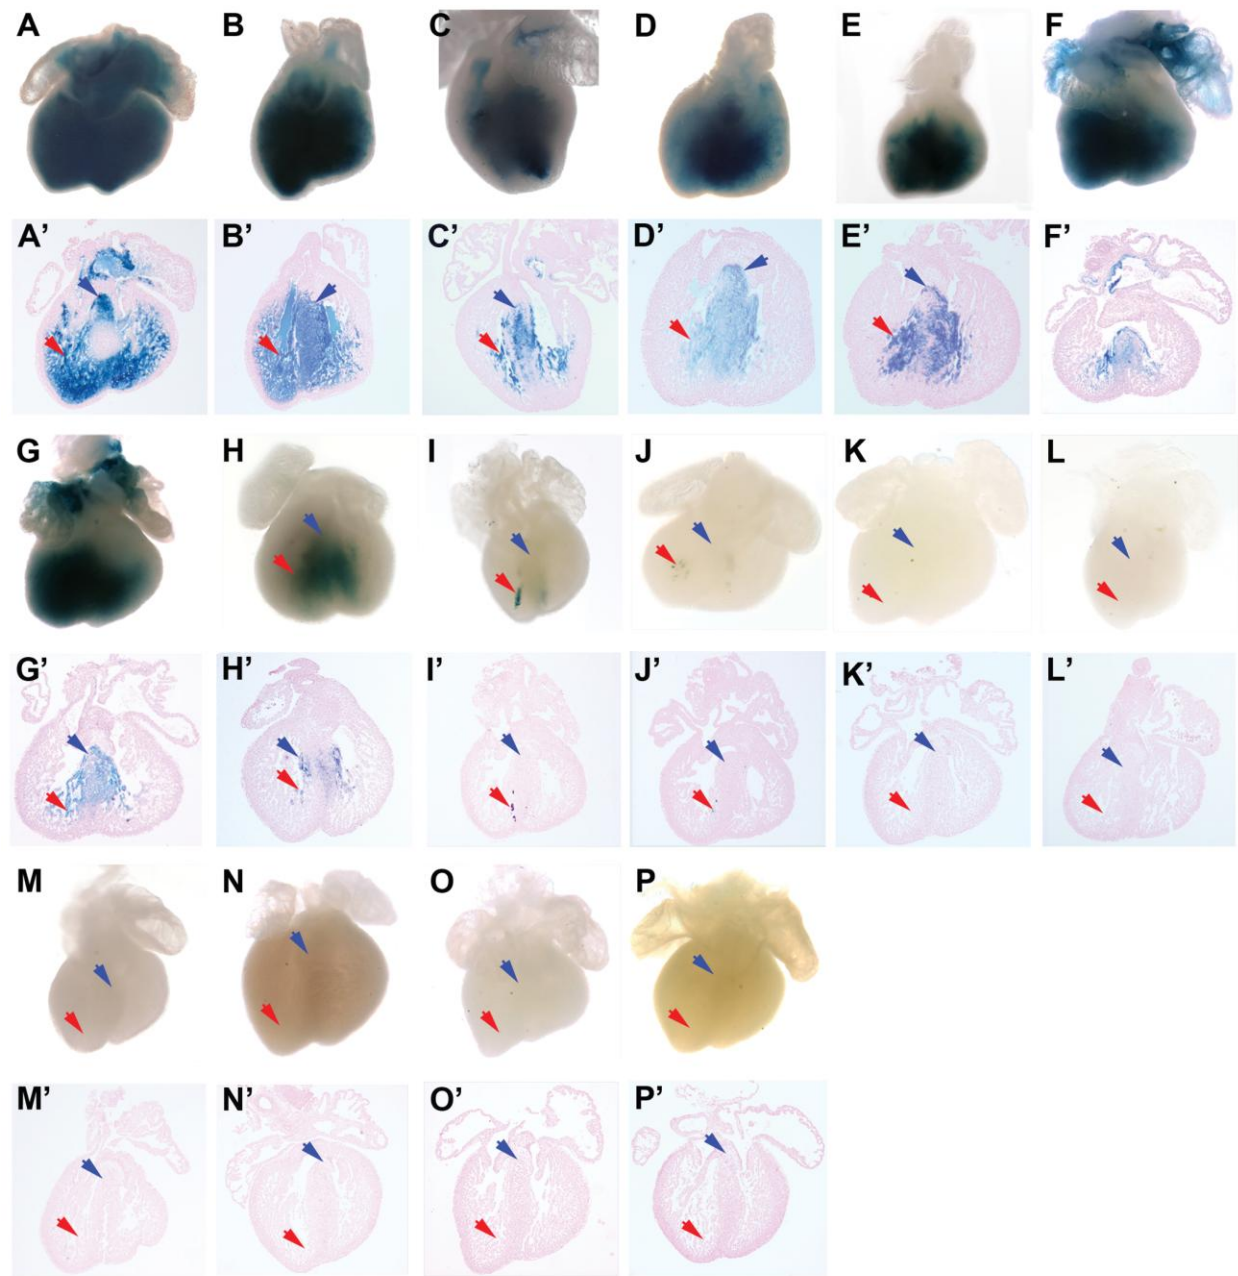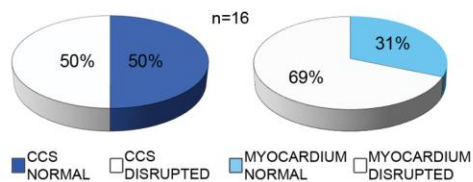

**Supplementary Figure 3: Evaluation of enhancer A SNP rs6801957 BAC transgenic embryos.** All enhancer A SNP rs6801957 BAC transgenic embryos (n=16) with the minor allele are shown at E13.5. Embryos are arranged in descending order of staining intensity for each construct. Sections embryos are shown at 10x original magnification.

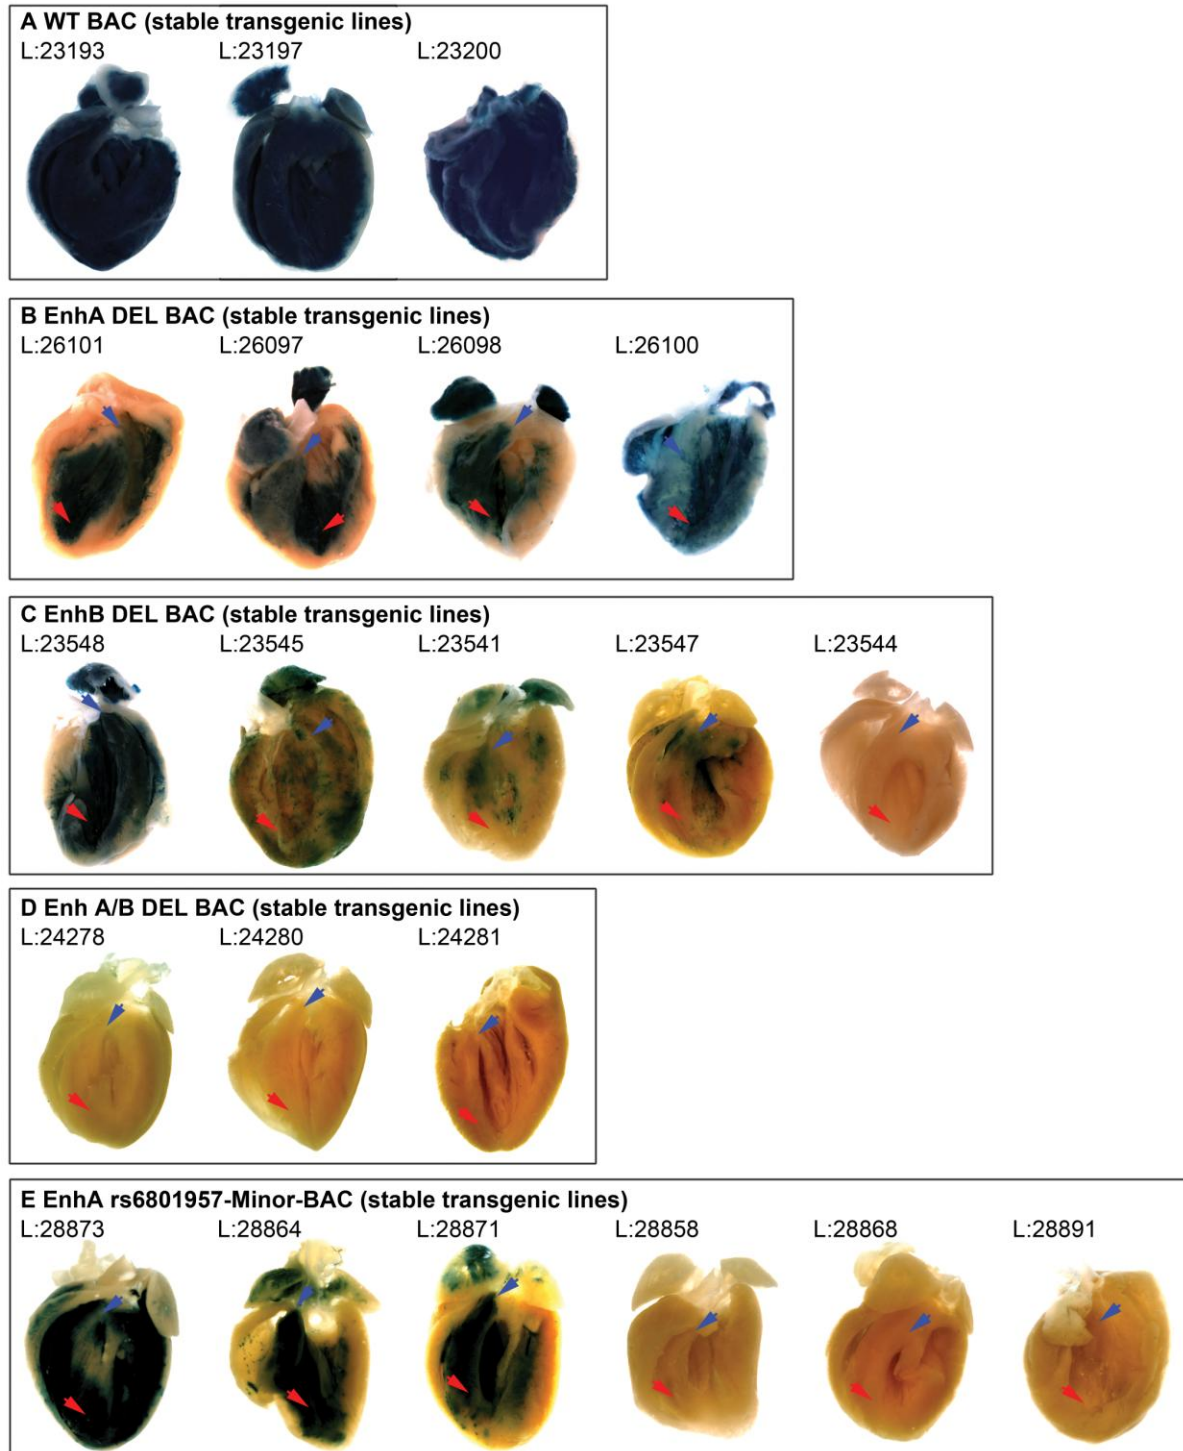

**Supplementary Figure 4: Evaluation of all BAC stable transgenic lines.** Adult hearts from 12-week-old wild-type (n=3 independent transgenic lines), enhancer A deleted (n=4 independent transgenic lines), enhancer B deleted (n=5 independent transgenic lines), enhancer A and B deleted (n=3 independent transgenic lines), and enhancer A SNP rs6801957 (n=6 independent transgenic lines) BAC stable transgenic lines are shown. Lines are arranged in descending order of staining intensity for each construct. At least 3 adult hearts of each stable line were evaluated.

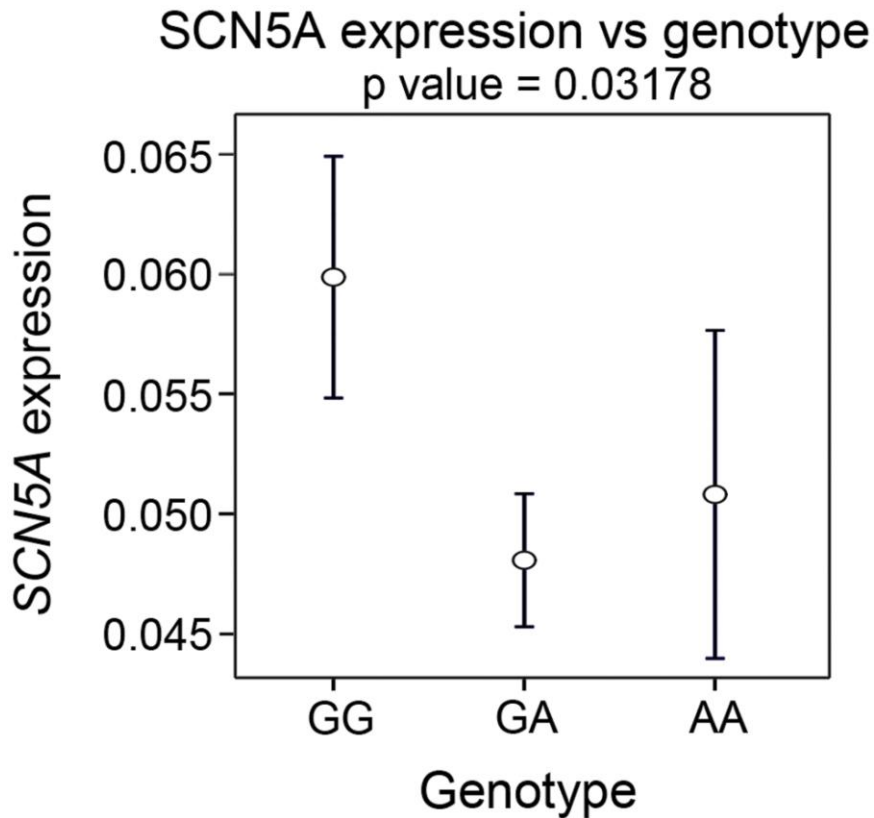

**Supplementary Figure 5: Correlation of *SCN5A* mRNA expression with SNP rs6801957 genotype in a set consisting of non-disease human donor hearts.** *SCN5A* expression was assessed by qRT-PCR in 87 human cardiac tissue samples. Samples homozygous at rs6801957 for the G allele expressed significantly more *SCN5A* RNA ( $0.060 \pm 0.029$  normalized expression,  $n=33$ ) than GA tissue samples ( $0.048 \pm 0.017$  normalized expression,  $n=37$ ) or AA tissue samples ( $0.050 \pm 0.028$  normalized expression  $n=17$ ) (additive genetic model,  $p=0.11$ ; dominant genetic model,  $p=0.03$ ). Expression was normalized for mRNA levels of *TNNI3* and *HPRT1*. Middle points represent median value, boxes represent 25% - 75% percentiles range, and the whiskers represent 5% - 95% percentiles range.

## Supplementary Table 1: Primers used for 4C-seq studies

|                      |                                                                             |
|----------------------|-----------------------------------------------------------------------------|
| Scn10a promoter F    | AATGATACGGCGACCACCGAACACTCTTTCCCTACACGACGCTCTTCCGATCTGATAGGGTCACCTTCACAGATC |
| Scn10a promoter R    | CAAGCAGAAGACGGCATAACGATGAGTGCGTTATCTTAGCTT                                  |
| EnhancerA-1 F        | AATGATACGGCGACCACCGAACACTCTTTCCCTACACGACGCTCTTCCGATCTGAGAGACCCACACGTTAGGATC |
| EnhancerA-1 R        | CAAGCAGAAGACGGCATAACGACGGTGAGGACAACATAGAC                                   |
| EnhancerA-2 F        | AATGATACGGCGACCACCGAACACTCTTTCCCTACACGACGCTCTTCCGATCTGACAGAGTTAGTGAACCTGATC |
| EnhancerA-2 R        | CAAGCAGAAGACGGCATAACGAGATACCAGCCCCACCAGATA                                  |
| Scn5a promoter A-B F | AATGATACGGCGACCACCGAACACTCTTTCCCTACACGACGCTCTTCCGATCTGTGCCAAGGGCACACTGATC   |
| Scn5a promoter A-B R | CAAGCAGAAGACGGCATAACGACCTCTAGAGAGCCTAGTCCC                                  |
| Scn5a promoter C F   | AATGATACGGCGACCACCGAACACTCTTTCCCTACACGACGCTCTTCCGATCTGAAAAATAGTGTCTCTGGATC  |
| Scn5a promoter C R   | CAAGCAGAAGACGGCATAACGAGGAAAGGGAATCTCTGTCTT                                  |
| EnhancerB F          | AATGATACGGCGACCACCGAACACTCTTTCCCTACACGACGCTCTTCCGATCTGAGACAGGCACATGCTGGGATC |
| EnhancerB R          | CAAGCAGAAGACGGCATAACGAAAGGAACTACACAGTCCCAA                                  |
